# Supplementary material for: A self-powered flexible sensing system based on a super-tough, high ionic conductivity supercapacitor and a rapid self-recovering fully physically crosslinked double network hydrogel
Source: Royal Society of Chemistry journal article supplement (doi:10.1039/d1tc04514h), 2021-12-30
Supplement: d1tc04514h1.pdf [file d1tc04514h1.pdf]

## Electronic Supplementary Information

### Self-Powered Flexible Sensing System Based on Super-Tough, High Ionic Conductivity and Rapid Self-Recovery Fully Physically Crosslinked Double Network Hydrogel

Shaoji Wu<sup>a,ξ</sup>, Li Tang<sup>a,ξ</sup>, Yue Xu<sup>a</sup>, Jiahao Yao<sup>a</sup>, Guangcong Tang<sup>a</sup>, Bailin Dai<sup>a,b</sup>, Wu Wang<sup>a</sup>, Jianxin Tang<sup>a,\*</sup> and Liang Gong<sup>a,\*</sup>

<sup>a</sup>*Hunan Key Laboratory of Biomedical Nanomaterials and Devices, College of Life Sciences and Chemistry, Hunan University of Technology, Zhuzhou 412007, China.*

<sup>b</sup>*College of Packaging and Materials Engineering, Hunan University of Technology, Zhuzhou 412007, China.*

<sup>ξ</sup>*The authors contribute equally to this work.*

<sup>\*</sup>To whom correspondence should be addressed.

jxtang0733@163.com (J.T.); gl569940808@126.com (L.G.)

#### Table of contents

|            |          |
|------------|----------|
| Figure S1  | -----S-2 |
| Figure S2  | -----S-2 |
| Figure S3  | -----S-2 |
| Figure S4  | -----S-3 |
| Figure S5  | -----S-3 |
| Figure S6  | -----S-3 |
| Figure S7  | -----S-4 |
| Figure S8  | -----S-4 |
| Figure S9  | -----S-4 |
| Figure S10 | -----S-5 |
| Table S1   | -----S-5 |
| References | -----S-5 |

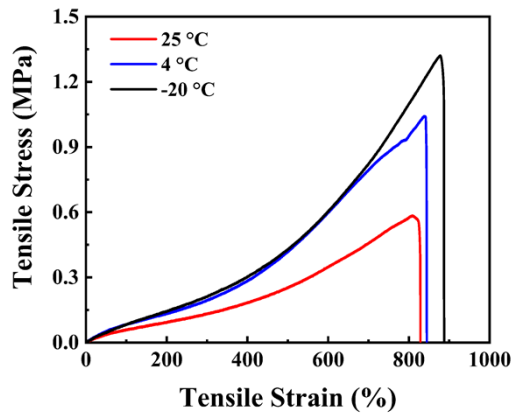

**Fig. S1** Stress-strain curves of P<sub>8</sub>N<sub>6</sub>H<sub>30</sub> DN hydrogels prepared by UV light polymerization after refrigerated at -20 °C, 4 °C, 25 °C for 2 h.

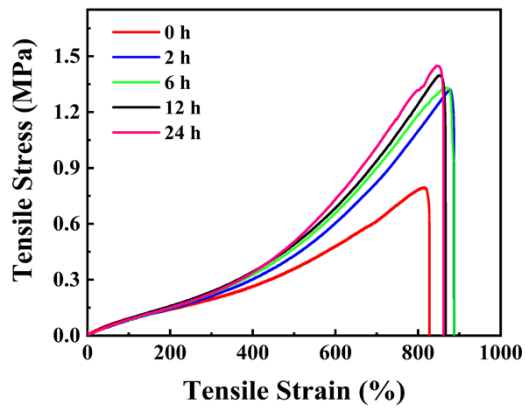

**Fig. S2** Stress-strain curves of P<sub>8</sub>N<sub>6</sub>H<sub>30</sub> DN hydrogels prepared by UV light polymerization after refrigerated at -20 °C for 0, 2, 6, 12 and 24 h.

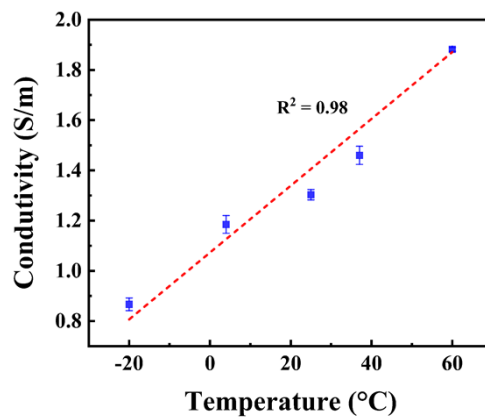

**Fig. S3** Conductivity of the PNH DN hydrogel at -20 °C, 4 °C, 25 °C, 37 °C and 60 °C.

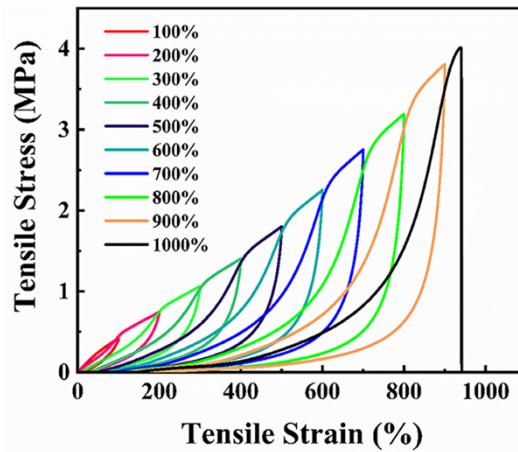

Fig. S4 The successive loading-unloading cycles of the PNH DN hydrogel.

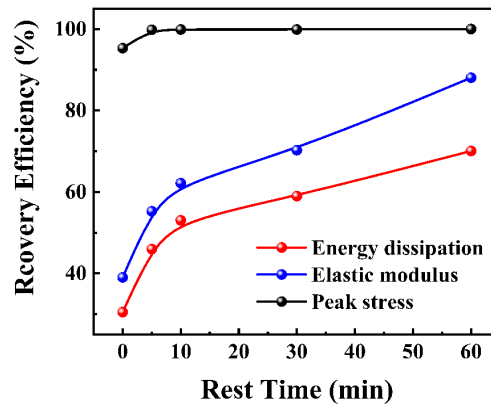

Fig. S5 Recovery efficiency of the energy dissipation, elastic modulus and peak stress of the PNH DN hydrogel with rest time of 0, 5, 10, 30 and 60 min.

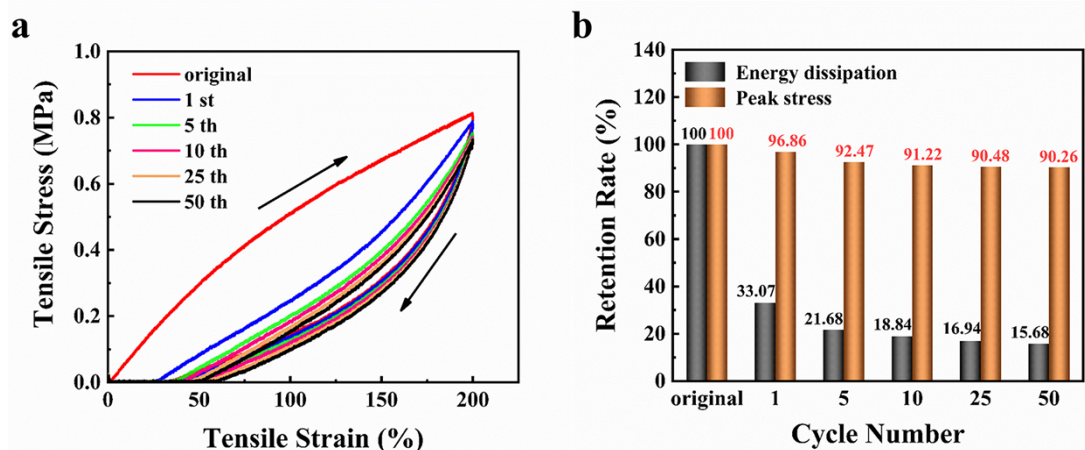

Fig. S6 (a) The anti-fatigue test and (b) retention rate of energy dissipation and peak stress of the PNH DN hydrogel.

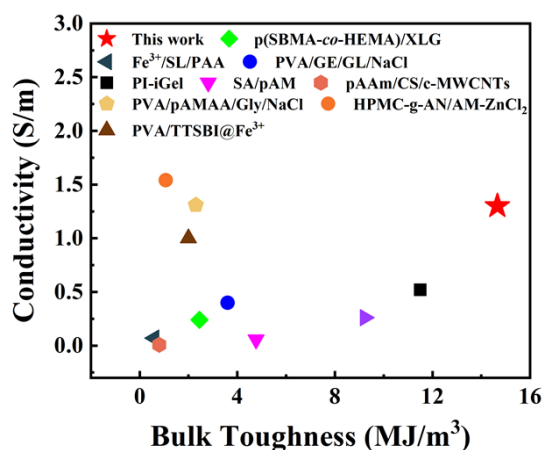

**Fig. S7** A comparison of bulk toughness and conductivity among different hydrogels, including PNH DN hydrogel in this work, p(SBMA-co-HEMA)/XLG,<sup>1</sup> Fe<sup>3+</sup>/SL/PAA,<sup>2</sup> PVA/GE/GL/NaCl,<sup>3</sup> PI-iGel,<sup>4</sup> SA/pAM,<sup>5</sup> pAAM/CS/c-MWCNTs,<sup>6</sup> PVA/pAMAA/Gly/NaCl,<sup>7</sup> HPMC-g-AN/AM-ZnCl<sub>2</sub>,<sup>8</sup> Strach/PVA/Gly/CaCl<sub>2</sub>,<sup>9</sup> and PVA/TTSBI@Fe<sup>3+</sup>.<sup>10</sup>

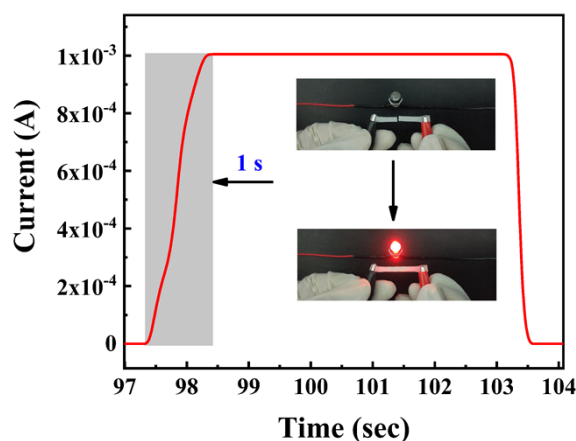

**Fig. S8** The resistance recover time of the PNH DN hydrogel during self-healing without external stimulation.

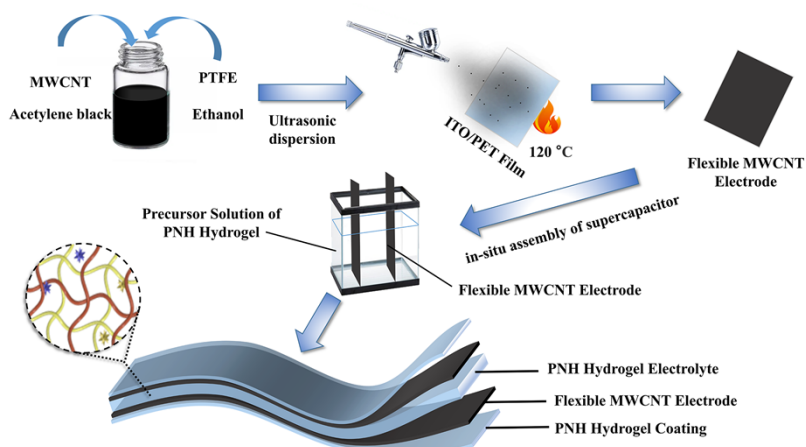

**Fig. S9** Schematic diagram of preparation of flexible solid state supercapacitor based on the PNH DN hydrogel.

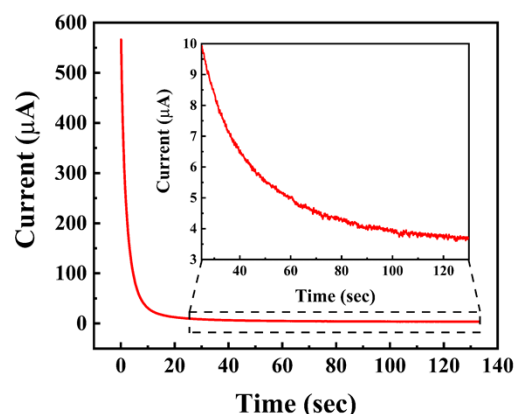

**Fig. S10** Self-discharge behavior of flexible solid state supercapacitor based on the PNH DN hydrogel.

**Table S1.** The properties of reported conductive hydrogels for flexible strain sensors.

| Composition                     | Maximal strain (%) | Maximal strength (KPa) | Maximal gauge factor | Sensing ranges (%) | Anti-freezing | Ref.      |
|---------------------------------|--------------------|------------------------|----------------------|--------------------|---------------|-----------|
| PVA/NaCl/pHEAA                  | 872                | 3760                   | 1.74                 | 0-735              | Yes           | This work |
| PAA/PANI                        | 1160               | 300                    | 1.05                 | 0-1130             | No            | 11        |
| $\kappa$ -carrageenan/PAAm      | 2100               | 560                    | 0.63                 | 0-1000             | No            | 12        |
| PVA/G/PDA/AgNPs                 | 331                | 1174                   | 0.94                 | 0-315              | No            | 13        |
| PVA/Gly/NaCl                    | 350                | 1400                   | 1.56                 | 0-355              | Yes           | 14        |
| PAAm/PDA/KCl                    | 1000               | 25                     | 0.7                  | 0-1000             | No            | 15        |
| Cellulose/NaCl                  | 236                | 50                     | 0.29                 | 0-230              | Yes           | 16        |
| PAAm/Casein/LiCl                | 1465               | 170                    | 0.4                  | 0-100              | Yes           | 17        |
| PSBMA/PVA                       | 400                | 600                    | 1.5                  | 0-300              | No            | 18        |
| PAA/GO/FeCl <sub>3</sub>        | 630                | 400                    | 1.32                 | 0-500              | No            | 19        |
| PAAm/PSBMA/NaCl                 | 1150               | 600                    | <1                   | 0-700              | No            | 20        |
| PAAm/Alginate/CaCl <sub>2</sub> | 1700               | 375                    | 0.3                  | 20-800             | No            | 21        |

## References

1. L. Wang, G. Gao, Y. Zhou, T. Xu, J. Chen, R. Wang, R. Zhang and J. Fu, *ACS Applied Materials & Interfaces*, 2019, **11**, 3506-3515.
2. Q. Wang, X. Pan, C. Lin, X. Ma, S. Cao and Y. Ni, *Chemical Engineering Journal*, 2020, **396**, 125341.
3. H. Chen, X. Ren and G. Gao, *ACS Applied Materials & Interfaces*, 2019, **11**, 28336-28344.
4. S. Xiang, S. Chen, M. Yao, F. Zheng and Q. Lu, *Journal of Materials Chemistry C*, 2019, **7**, 9625-9632.
5. X. Zhang, N. Sheng, L. Wang, Y. Tan, C. Liu, Y. Xia, Z. Nie and K. Sui, *Materials Horizons*, 2019, **6**, 326-333.
6. S. Xia, S. Song, F. Jia and G. Gao, *Journal of Materials Chemistry B*, 2019, **7**, 4638-4648.
7. J. Huang, S. Peng, J. Gu, G. Chen, J. Gao, J. Zhang, L. Hou, X. Yang, X. Jiang and L. Guan, *Materials*

- Horizons*, 2020, **7**, 2085-2096.
8. D. Chen, X. Zhao, X. Wei, J. Zhang, D. Wang, H. Lu and P. Jia, *ACS Applied Materials & Interfaces*, 2020, **12**, 53247-53256.
  9. J. Lu, J. Gu, O. Hu, Y. Fu, D. Ye, X. Zhang, Y. Zheng, L. Hou, H. Liu and X. Jiang, *Journal of Materials Chemistry A*, 2021, **9**, 18406-18420.
  10. X. Zhang, J. Cai, W. Liu, W. Liu and X. Qiu, *Polymer*, 2020, **188**, 122147.
  11. Z. Wang, H. Zhou, J. Lai, B. Yan, H. Liu, X. Jin, A. Ma, G. Zhang, W. Zhao and W. Chen, *Journal of Materials Chemistry C*, 2018, **6**, 9200-9207.
  12. S. Liu and L. Li, *ACS Applied Materials & Interfaces*, 2017, **9**, 26429-26437.
  13. L. Fan, J. Xie, Y. Zheng, D. Wei, D. Yao, J. Zhang and T. Zhang, *ACS Applied Materials & Interfaces*, 2020, **12**, 22225-22236.
  14. X.-J. Zha, S.-T. Zhang, J.-H. Pu, X. Zhao, K. Ke, R.-Y. Bao, L. Bai, Z.-Y. Liu, M.-B. Yang and W. Yang, *ACS Applied Materials & Interfaces*, 2020, **12**, 23514-23522.
  15. X. Jing, H. Y. Mi, Y. J. Lin, E. Enriquez, X. F. Peng and L. S. Turng, *ACS Applied Materials & Interfaces*, 2018, **10**, 20897-20909.
  16. R. Tong, G. Chen, D. Pan, J. Tian, H. Qi, R. a. Li, F. Lu and M. He, *ACS Sustainable Chemistry & Engineering*, 2019, **7**, 14256-14265.
  17. L. Guan, S. Yan, X. Liu, X. Li and G. Gao, *Journal of Materials Chemistry B*, 2019, **7**, 5230-5236.
  18. Z. Wang, J. Chen, L. Wang, G. Gao, Y. Zhou, R. Wang, T. Xu, J. Yin and J. Fu, *Journal of Materials Chemistry B*, 2019, **7**, 24-29.
  19. X. Jing, H. Y. Mi, X. F. Peng and L. S. Turng, *Carbon*, 2018, **136**, 63-72.
  20. B. Yang and W. Yuan, *ACS Applied Materials & Interfaces*, 2019, **11**, 40620-40628.
  21. H. Sun, K. Zhou, Y. Yu, X. Yue, K. Dai, G. Zheng, C. Liu and C. Shen, *Macromolecular Materials and Engineering*, 2019, **304**, 1900227.
